# Supplementary material for: Effect of Tai Chi vs Aerobic Exercise on Blood Pressure in Patients With Prehypertension: A Randomized Clinical Trial
Source: PubMed Central journal article supplement (PMC10858403; doi:10.1001/jamanetworkopen.2023.54937), 2024-02-09
Supplement: jamanetwopen-e2354937-s003.pdf [file jamanetwopen-e2354937-s003.pdf]

## Data Sharing Statement

Li. Effect of Tai Chi vs Aerobic Exercise on Blood Pressure in Patients With Prehypertension. *JAMA Netw Open*. Published February 09, 2024. doi:10.1001/jamanetworkopen.2023.54937

### Data

**Data available:** Yes

**Data types:** Deidentified participant data

**How to access data:** [xingyanwei12345@163.com](mailto:xingyanwei12345@163.com)

**When available:** beginning date: 12-31-2024

### Supporting Documents

**Document types:** None

### Additional Information

**Who can access the data:** The data will be available to researchers who have been approved for a specified purpose and will sign a data access agreement with the relevant parties.

**Types of analyses:** Individual participant data that underlie the results of this article, after deidentification, will be available for researchers who provide a methodologically sound proposal (e.g. individual participant meta-analysis).

**Mechanisms of data availability:** Data will be made available after the approval of a proposal.
